# Supplementary material
Source: PubMed Central journal article supplement (PMC9859968)
Supplement: NIHMS1825008-supplement-supinfo.pdf [file NIHMS1825008-supplement-supinfo.pdf]

# Intercellular model predicts mechanisms of inflammation-fibrosis coupling after myocardial infarction

Mukti Chowkwale, Merry L Lindsey, and Jeffrey J Saucerman

DOI: 10.1113/JP283346

Corresponding author(s): Jeffrey Saucerman ([jjs3g@virginia.edu](mailto:jjs3g@virginia.edu))

The following individual(s) involved in review of this submission have agreed to reveal their identity: Ronald Vagnozzi (Referee #1)

---

## Review Timeline:

|                     |             |
|---------------------|-------------|
| Submission Date:    | 19-May-2022 |
| Editorial Decision: | 13-Jun-2022 |
| Revision Received:  | 08-Jul-2022 |
| Accepted:           | 18-Jul-2022 |

---

Senior Editor: Bjorn Knollmann

Reviewing Editor: Eleonora Grandi

## Transaction Report:

(Note: With the exception of the correction of typographical or spelling errors that could be a source of ambiguity, letters and reports are not edited. Depending on transfer agreements, referee reports obtained elsewhere may or may not be included in this compilation. Referee reports are anonymous unless the Referee chooses to sign their reports.)

Dear Dr Saucerman,

Re: JP-RP-2022-283346 "Intercellular model predicts mechanisms of inflammation-fibrosis coupling after myocardial infarction" by Mukti Chowkwale, Merry L Lindsey, and Jeffrey J Saucerman

Thank you for submitting your manuscript to The Journal of Physiology. It has been assessed by a Reviewing Editor and by 2 expert Referees and I am pleased to tell you that it is considered to be acceptable for publication following satisfactory revision.

Please advise your co-authors of this decision as soon as possible.

The reports are copied at the end of this email. Please address all of the points and incorporate all requested revisions, or explain in your Response to Referees why a change has not been made.

**NEW POLICY:** In order to improve the transparency of its peer review process The Journal of Physiology publishes online as supporting information the peer review history of all articles accepted for publication. Readers will have access to decision letters, including all Editors' comments and referee reports, for each version of the manuscript and any author responses to peer review comments. Referees can decide whether or not they wish to be named on the peer review history document.

Authors are asked to use The Journal's premium BioRender (<https://biorender.com/>) account to create/redraw their Abstract Figures. Information on how to access The Journal's premium BioRender account is here: <https://physoc.onlinelibrary.wiley.com/journal/14697793/biorender-access> and authors are expected to use this service. This will enable Authors to download high-resolution versions of their figures. The link provided should only be used for the purposes of this submission. Authors will be charged for figures created on this premium BioRender account if they are not related to this manuscript submission.

I hope you will find the comments helpful and have no difficulty returning your revisions within 4 weeks.

Your revised manuscript should be submitted online using the links in Author Tasks Link Not Available.

Any image files uploaded with the previous version are retained on the system. Please ensure you replace or remove all files that have been revised.

#### REVISION CHECKLIST:

- Article file, including any tables and figure legends, must be in an editable format (eg Word)
- Abstract figure file (see above)
- Statistical Summary Document
- Upload each figure as a separate high quality file
- Upload a full Response to Referees, including a response to any Senior and Reviewing Editor Comments;
- Upload a copy of the manuscript with the changes highlighted.

You may also upload:

- A potential 'Cover Art' file for consideration as the Issue's cover image;
- Appropriate Supporting Information (Video, audio or data set [https://jp.msubmit.net/cgi-bin/main.plex?form\\_type=display\\_requirements#supp](https://jp.msubmit.net/cgi-bin/main.plex?form_type=display_requirements#supp)).

To create your 'Response to Referees' copy all the reports, including any comments from the Senior and Reviewing Editors, into a Word, or similar, file and respond to each point in colour or CAPITALS and upload this when you submit your revision.

I look forward to receiving your revised submission.

If you have any queries please reply to this email and staff will be happy to assist.

Yours sincerely,

-----  
REQUIRED ITEMS:

-Author photo and profile. First (or joint first) authors are asked to provide a short biography (no more than 100 words for one author or 150 words in total for joint first authors) and a portrait photograph. These should be uploaded and clearly labelled with the revised version of the manuscript. See [Information for Authors](#) for further details.

-Your manuscript must include a complete [Additional Information section](#)

-Please upload separate high-quality [figure files](#) via the submission form.

-Please ensure that any tables are in Word format and are, wherever possible, embedded in the article file itself.

-Your paper contains Supporting Information of a type that we no longer publish. Any information essential to an understanding of the paper must be included as part of the main manuscript and figures. The only Supporting Information that we publish are video and audio, 3D structures, program codes and large data files. Your revised paper will be returned to you if it does not adhere to our [Supporting Information Guidelines](#)

-A Statistical Summary Document, summarising the statistics presented in the manuscript, is required upon revision. It must be on the Journal's template, which can be downloaded from the link in the Statistical Summary Document section here: [https://jp.msubmit.net/cgi-bin/main.plex?form\\_type=display\\_requirements#statistics](https://jp.msubmit.net/cgi-bin/main.plex?form_type=display_requirements#statistics)

-Please include an Abstract Figure. The Abstract Figure is a piece of artwork designed to give readers an immediate understanding of the research and should summarise the main conclusions. If possible, the image should be easily 'readable' from left to right or top to bottom. It should show the physiological relevance of the manuscript so readers can assess the importance and content of its findings. Abstract Figures should not merely recapitulate other figures in the manuscript. Please try to keep the diagram as simple as possible and without superfluous information that may distract from the main conclusion(s). Abstract Figures must be provided by authors no later than the revised manuscript stage and should be uploaded as a separate file during online submission labelled as File Type 'Abstract Figure'. Please ensure that you include the figure legend in the main article file. All Abstract Figures should be created using BioRender. Authors should use The Journal's premium BioRender account to export high-resolution images. Details on how to use and access the premium account are included as part of this email.

-----  
EDITOR COMMENTS

Reviewing Editor:

Both reviewers commented on an outstanding and potentially impactful study. Major comments to be addressed in the revision include:

- please provide more detail on the experimental data and equations used for model building

- please clarify controversial outcomes and experiment-model disagreements; please add discussion on how your model might not capture chronic post-MI inflammation, and the differential role of tissue-resident macrophages vs. monocyte derived macrophages

- please analyze the simplified fibroblast model to determine the TGF $\beta$  concentration at which the transcritical bifurcation occurs, and potentially revise the argument of proliferation being the main driver of the ultrasensitive switch

Senior Editor:

I concur with the reviewing editor.

-----  
REFeree COMMENTS

Referee #1:

Here Chowkwale et al present a computational framework and validation to model cellular dynamics and immune-fibroblast interactions in the setting of myocardial infarction (MI). The authors use published experimental data in mouse models to build predictive algorithms for a number of key biological parameters of cardiac wound healing (cell content, cytokine secretion, phagocytosis, etc), and then validate their model through comparison with additional published data. They go on to probe this computation model and reveal interesting interactions between cardiac infarct size, neutrophil content, and collagen deposition through an IL-1beta dependent mechanism.

Overall this is an excellent paper and will likely benefit the field in my opinion. The study is well-written and well executed. I have very few concerns to raise, mostly some suggestions for the authors to expand upon:

1. The strength and validity of this computation model depends on the accuracy of past literature used. The authors provide a very useful set of tables defining their chosen parameters from published studies. These tables would be even more informative if including some description of how key parameters were measured in the initial studies. For example, monocyte dynamics could have been measured by flow cytometry or histology; likewise cytokine/chemokine levels or collagen content might have been assessed differently between these publications. Were paper-specific methods considered in how these parameters were defined, and would that impact the model dynamics?

2. It is intriguing that this model predicts an almost complete loss of macrophages from the post-MI heart by day 21 (Fig 2A). While monocyte-macrophage content certainly peaks in the early phases of MI in mice, there are also numerous studies showing persistent functions and content of cardiac macrophages in the chronically infarcted heart, and during heart failure. The authors should comment on this, and specifically how their model might differ in predictive power between early post-MI wound healing (within the first ~7 days) versus chronic post-MI inflammation. Likewise, a differential role of tissue-resident macrophages as opposed to monocyte derived macrophages might not be fully reflected in this model, based on the studies/parameters selected. The authors should also comment on this in discussion.

Referee #2:

The authors present a new computational model of wound healing post-MI that incorporates known intercellular interactions derived from a large-scale literature review. The model was tuned and suitably validated against published datasets from mice, then used to probe factors that drive and resolve inflammation. Key results include highlighting (i) a coupling between inflammation and fibrosis (ii) ultrasensitivity of collagen deposition to infarct size. Causal sub-features in the model were identified (a positive feedback loop between neutrophils and IL-1b; a transcritical bifurcation in fibroblasts with respect to the TGFb concentration) to provide mechanistic understanding. Overall this is a well-executed study with original and significant results. A few clarifications or minor additions could yet improve the manuscript:

1) It is not mentioned how inhibition (seen in Fig 1) is modeled - please clarify.

2) What are the units of MatColl in Eq 5? It appears to have been normalized rather than a concentration - but, if so, how?

3) In the highlighted experimental/model disagreements (lines 260-265), the choice of some of the examples are not clear to me e.g. the effects of IL-1b and TGFb inhibition on collagen do appear to agree qualitatively between simulation/experiment (Fig 3C).

4) In Fig 3 and related analysis, is it appropriate to consider decreased MMP9 after MMP9 inhibition, decreased TNFa after TNFa inhibition and decreased IL-1 after IL-1 receptor KO as predictions/validations? It seems that these are effectively the model inputs, so a justification would be needed.

5) The transcritical bifurcation in the simplified fibroblast model is a very interesting result with potentially important physiological consequences. Have the authors considered finding the steady state and TGFb concentration at which the bifurcation occurs analytically, i.e. in terms of the parameters  $\lambda$ ,  $d$ ,  $F_{max}$  and infarct size? It is not quite at TGFb=0, as perhaps implied in lines 371/372, and this relatively short calculation could provide more rigor to the argument of proliferation being the main driver of the ultrasensitive switch (without first changing the model structure as in Figs 7E,F). It would also show how altered parameters can shift the critical TGFb concentration needed to trigger the switch (and resulting severity) - relevant to the discussion of potential therapeutic strategies.

6) For consistency, consider changing the rate parameter subscripts in Eqs 4-6 to match those in Table 4 (or vice versa).

7) In Fig 6B,D, a more descriptive y-axis label would be helpful, i.e. what does "area under the curve" represent physiologically?

---

END OF COMMENTS

**Confidential Review**

**19-May-2022**

---



We thank the reviewers and editors for highlighting the manuscript's strengths and for providing constructive criticism, which has improved the clarity and quality of our study. In this revision, we have made the suggested revisions. We believe that these additions have further enhanced the quality of our study. Detailed responses are provided below in red.

## EDITOR COMMENTS

Reviewing Editor:

Both reviewers commented on an outstanding and potentially impactful study. Major comments to be addressed in the revision include:

We appreciate the positive comments of the Reviewing Editor and Senior Editor.

- please provide more detail on the experimental data and equations used for model building  
As described in response to Referee #1 Comment 1, we updated the text and Tables to provide more details.

- please clarify controversial outcomes and experiment-model disagreements; please add discussion on how your model might not capture chronic post-MI inflammation, and the differential role of tissue-resident macrophages vs. monocyte derived macrophages  
As described in response to Referee #1 Comment 2 and Referee Comment 3, we have clarified and better contextualize the few instances of experiment-model disagreements.

- please analyze the simplified fibroblast model to determine the TGF $\beta$  concentration at which the transcritical bifurcation occurs, and potentially revise the argument of proliferation being the main driver of the ultrasensitive switch  
As described in response to Referee #2 Comment 5, we performed additional analysis of the transcritical bifurcation, which identifies the critical TGF $\beta$  concentration and further supports the role of proliferation.

Senior Editor:

I concur with the reviewing editor.

-----

## REFEREE COMMENTS

Referee #1:

Here Chowkwale et al present a computational framework and validation to model cellular dynamics and immune-fibroblast interactions in the setting of myocardial infarction (MI). The authors use published experimental data in mouse models to build predictive algorithms for a number of key biological parameters of cardiac wound healing (cell content, cytokine secretion, phagocytosis, etc), and then validate their model through comparison with additional published data. They go on to probe this computation model and reveal interesting interactions between cardiac infarct size, neutrophil content, and collagen deposition through an IL-1 $\beta$  dependent mechanism.

Overall this is an excellent paper and will likely benefit the field in my opinion. The study is well-

written and well executed. I have very few concerns to raise, mostly some suggestions for the authors to expand upon:

We thank the reviewer for their accurate summary of the manuscript's contributions and positive comments on the writing and rigor of the study.

1. The strength and validity of this computation model depends on the accuracy of past literature used. The authors provide a very useful set of tables defining their chosen parameters from published studies. These tables would be even more informative if including some description of how key parameters were measured in the initial studies. For example, monocyte dynamics could have been measured by flow cytometry or histology; likewise cytokine/chemokine levels or collagen content might have been assessed differently between these publications. Were paper-specific methods considered in how these parameters were defined, and would that impact the model dynamics?

We appreciate the reviewer's suggestion to include descriptions of how key parameters were measured. We updated **Tables 3 and 4** to describe these methods per parameter. A few examples from Table 4 are shown below.

| Parameter                                | Description                      | Value   | Unit            | Measurement techniques                          | Citation                    |
|------------------------------------------|----------------------------------|---------|-----------------|-------------------------------------------------|-----------------------------|
| <i>TNF<math>\alpha</math> parameters</i> |                                  |         |                 |                                                 |                             |
| $k_{TNF\alpha,CM}$                       | Secretion rate by cardiomyocytes | 5e-7    | pg/ml/cell/hour | ELISA                                           | (Horton et al., 2006)       |
| $k_{TNF\alpha,N}$                        | Secretion rate by neutrophils    | 1.2e-3  | pg/ml/cell/hour | Immunofluorescence                              | (Finsterbusch et al., 2014) |
| $k_{TNF\alpha,Mo}$                       | Secretion rate by monocytes      | 1.58e-4 | pg/ml/cell/hour | ELISA                                           | (Matic & Simon, 1991)       |
| $k_{TNF\alpha,M\phi}$                    | Secretion rate by macrophages    | 3.15e-4 | pg/ml/cell/hour | ELISA                                           | (Minshawi et al., 2019)     |
| $k_{TNF\alpha,F}$                        | Secretion rate by fibroblasts    | 9.5e-5  | pg/ml/cell/hour | ELISA                                           | (Del Re et al., 2010)       |
| $k_{TNF\alpha,deg}$                      | Degradation rate                 | 0.4786  | 1/hour          | Ribonuclease protection assay and curve fitting | (Deten & Zimmer, 2002)      |

The rigor and reproducibility quality of the methods for each individual article reviewed were considered while deriving the raw parameter values from literature. The articles selected for inclusion were also selected based on whether absolute value outputs of the assays (e.g. protein concentrations in ELISAs) were available. For instances when absolute values were not available, assays that provided relative values (e.g. relative expression in Western blots) were selected to guide parameter estimation. The variations in methods across the articles selected did not impact the model dynamics as the literature-derived parameters were optimized to fit experimental output time courses.

2. It is intriguing that this model predicts an almost complete loss of macrophages from the post-MI heart by day 21 (Fig 2A). While monocyte-macrophage content certainly peaks in the early phases of MI in mice, there are also numerous studies showing persistent functions and content of cardiac macrophages in the chronically infarcted heart, and during heart failure. The authors should comment on this, and specifically how their model might differ in predictive power between early post-MI wound healing (within the first ~7 days) versus chronic post-MI



inflammation. Likewise, a differential role of tissue-resident macrophages as opposed to monocyte derived macrophages might not be fully reflected in this model, based on the studies/parameters selected. The authors should also comment on this in discussion.

The reviewer makes an important point about highlighting one potential limitation of the model. In response to this comment, we added a paragraph in the discussion to reflect upon macrophage numbers:

Lines 472-480: "Our model predicts dynamics for acute, transient inflammation post myocardial infarction. In the presence of chronic inflammation due to conditions such as cardiometabolic defects, aging, or co-medications, there is a dysregulation of inflammation resolution (Halade & Lee, 2022; Kolpakov et al., 2020). This model could be further extended to predict intercellular dynamics in the presence of chronic post-MI inflammation. Moreover, the model does not include tissue-resident macrophages (Dick et al., 2019; Jia et al., 2022; Nahrendorf et al., 2007). Tissue-resident macrophages are lost post-MI, but they recover to pre-infarct levels by around 4 weeks after infarction (Dick et al., 2019). Sufficient data was not available to model the dynamics of tissue-resident macrophages. However, the model accurately simulates the behavior of monocyte-derived macrophages post myocardial infarction."

Referee #2:

The authors present a new computational model of wound healing post-MI that incorporates known intercellular interactions derived from a large-scale literature review. The model was tuned and suitably validated against published datasets from mice, then used to probe factors that drive and resolve inflammation. Key results include highlighting (i) a coupling between inflammation and fibrosis (ii) ultrasensitivity of collagen deposition to infarct size. Causal sub-features in the model were identified (a positive feedback loop between neutrophils and IL-1b; a transcritical bifurcation in fibroblasts with respect to the TGFb concentration) to provide mechanistic understanding. Overall this is a well-executed study with original and significant results. A few clarifications or minor additions could yet improve the manuscript:

We appreciate the reviewer's detailed description of the new contributions and positive comments on the manuscript.

1) It is not mentioned how inhibition (seen in Fig 1) is modeled - please clarify.

We have updated the text to illustrate an example of how inhibition is modeled.

Lines 149-151: "In Eq. 5, the terms  $\frac{TGF\beta}{TGF\beta + K_{TGF\beta}}$  and  $\frac{MMP9}{MMP9 + K_{MMP9}}$  show activation of the dynamics by TGF $\beta$  and MMP-9, while the term  $\left(\frac{1}{MatColl+1}\right)$  models inhibition by mature collagen."

2) What are the units of MatColl in Eq 5? It appears to have been normalized rather than a concentration - but, if so, how?

MatColl is in units of pg/ml as shown in Table 4. We provide units for all parameters and variables in Tables 3-5.

3) In the highlighted experimental/model disagreements (lines 260-265), the choice of some of the examples are not clear to me e.g. the effects of IL-1b and TGFb inhibition on collagen do appear to agree qualitatively between simulation/experiment (Fig 3C).

We thank the reviewer for pointing out this discrepancy, and have removed the example from the manuscript.

4) In Fig 3 and related analysis, is it appropriate to consider decreased MMP9 after MMP9 inhibition, decreased TNF $\alpha$  after TNF $\alpha$  inhibition and decreased IL-1 after IL-1 receptor KO as predictions/validations? It seems that these are effectively the model inputs, so a justification would be needed.

The comparisons “decreased MMP-9 after MMP-9 inhibition” and “decreased TNF $\alpha$  after TNF $\alpha$  inhibition” were included to mimic structure of the experimental studies, but the reviewer makes a good point. Hence, we removed the two from the validation study and changed Figure 3 to reflect that. However, IL-1 receptor KO (not a model input) limits the downstream effects of IL-1, but does not have a direct effect on IL-1 in the system. Thus, that validation relationship tested emergent behavior, and not direct effects.

5) The transcritical bifurcation in the simplified fibroblast model is a very interesting result with potentially important physiological consequences. Have the authors considered finding the steady state and TGF $\beta$  concentration at which the bifurcation occurs analytically, i.e. in terms of the parameters  $\lambda$ ,  $d$ ,  $F_{max}$  and infarct size? It is not quite at TGF $\beta$ =0, as perhaps implied in lines 371/372, and this relatively short calculation could provide more rigor to the argument of proliferation being the main driver of the ultrasensitive switch (without first changing the model structure as in Figs 7E,F). It would also show how altered parameters can shift the critical TGF $\beta$  concentration needed to trigger the switch (and resulting severity) - relevant to the discussion of potential therapeutic strategies.

The reviewer is correct. Based on this suggestion, we solved the transcritical bifurcation analytically and it was found to be at TGF $\beta$  = 0.0717 pg/ml. We updated section 4 in the methods (Reduced fibroblast model) to include parameter values used to calculate the transcritical bifurcation, and we included another section titled “Analyses of reduced fibroblast model” to discuss the steady state and bifurcation analysis.

6) For consistency, consider changing the rate parameter subscripts in Eqs 4-6 to match those in Table 4 (or vice versa).

We appreciate the reviewer’s suggestion and updated Eqs 4-6 to match the values in Table 4.

7) In Fig 6B,D, a more descriptive y-axis label would be helpful, i.e. what does “area under the curve” represent physiologically?

To reflect the reviewer’s comment, we updated the manuscript to explain the physiological representation of “area under the curve”.

Lines 378-379: “The relative area under the curve represents a cumulative sum of the secreted factors in simulated time course.”

---

END OF COMMENTS

#### References

- Dick, S. A., Macklin, J. A., Nejat, S., Momen, A., Clemente-Casares, X., Althagafi, M. G., Chen, J., Kantores, C., Hosseinzadeh, S., Aronoff, L., Wong, A., Zaman, R., Barbu, I., Besla, R., Lavine, K. J., Razani, B., Ginhoux, F., Husain, M., Cybulsky, M. I., ... Epelman, S. (2019). Self-renewing resident cardiac macrophages limit adverse remodeling following myocardial infarction. *Nature Immunology*, 20(1), 29–39. <https://doi.org/10.1038/s41590-018-0272-2>
- Halade, G. V., & Lee, D. H. (2022). Inflammation and resolution signaling in cardiac repair and heart failure. *EBioMedicine*, 79. <https://doi.org/10.1016/j.ebiom.2022.103992>
- Jia, D., Chen, S., Bai, P., Luo, C., Liu, J., Sun, A., & Ge, J. (2022). Cardiac Resident Macrophage-Derived Legumain Improves Cardiac Repair by Promoting Clearance and

- Degradation of Apoptotic Cardiomyocytes After Myocardial Infarction. *Circulation*, 145(20), 1542–1556. <https://doi.org/10.1161/CIRCULATIONAHA.121.057549>
- Kolpakov, M. A., Guo, X., Rafiq, K., Vlasenko, L., Hooshdaran, B., Seqqat, R., Wang, T., Fan, X., Tilley, D. G., Kostyak, J. C., Kunapuli, S. P., Houser, S. R., & Sabri, A. (2020). Loss of Protease-Activated Receptor 4 Prevents Inflammation Resolution and Predisposes the Heart to Cardiac Rupture After Myocardial Infarction. *Circulation*, 142(8), 758–775. <https://doi.org/10.1161/CIRCULATIONAHA.119.044340>
- Nahrendorf, M., Swirski, F. K., Aikawa, E., Stangenberg, L., Wurdinger, T., Figueiredo, J.-L., Libby, P., Weissleder, R., & Pittet, M. J. (2007). The healing myocardium sequentially mobilizes two monocyte subsets with divergent and complementary functions. *The Journal of Experimental Medicine*, 204(12), 3037–3047. <https://doi.org/10.1084/jem.20070885>
- Roberts, R., DeMello, V., & Sobel, B. E. (1976). Deleterious effects of methylprednisolone in patients with myocardial infarction. *Circulation*, 53(3 Suppl), I204-206.

Dear Dr Saucerman,

Re: JP-RP-2022-283346R1 "Intercellular model predicts mechanisms of inflammation-fibrosis coupling after myocardial infarction" by Mukti Chowkwale, Merry L Lindsey, and Jeffrey J Saucerman

I am pleased to tell you that your paper has been accepted for publication in The Journal of Physiology.

\*\*\*IMPORTANT\*\*\*

We need you to check your article (Word) file and make two small administrative changes (see Senior Editor comments towards the end of this email). Please then send an UPDATED Word file to: [jp@physoc.org](mailto:jp@physoc.org)

**NEW POLICY:** In order to improve the transparency of its peer review process The Journal of Physiology publishes online as supporting information the peer review history of all articles accepted for publication. Readers will have access to decision letters, including all Editors' comments and referee reports, for each version of the manuscript and any author responses to peer review comments. Referees can decide whether or not they wish to be named on the peer review history document.

The last Word version of the paper submitted will be used by the Production Editors to prepare your proof. When this is ready you will receive an email containing a link to Wiley's Online Proofing System. The proof should be checked and corrected as quickly as possible.

Authors should note that it is too late at this point to offer corrections prior to proofing. The accepted version will be published online, ahead of the copy edited and typeset version being made available. Major corrections at proof stage, such as changes to figures, will be referred to the Reviewing Editor for approval before they can be incorporated. Only minor changes, such as to style and consistency, should be made a proof stage. Changes that need to be made after proof stage will usually require a formal correction notice.

All queries at proof stage should be sent to [TJP@wiley.com](mailto:TJP@wiley.com)

Are you on Twitter? Once your paper is online, why not share your achievement with your followers. Please tag The Journal (@jphysiol) in any tweets and we will share your accepted paper with our 23,000+ followers!

Yours sincerely,

Bjorn Knollmann  
Senior Editor  
The Journal of Physiology

P.S. - You can help your research get the attention it deserves! Check out Wiley's free Promotion Guide for best-practice recommendations for promoting your work at [www.wileyauthors.com/eeo/guide](http://www.wileyauthors.com/eeo/guide). And learn more about Wiley Editing Services which offers professional video, design, and writing services to create shareable video abstracts, infographics, conference posters, lay summaries, and research news stories for your research at [www.wileyauthors.com/eeo/promotion](http://www.wileyauthors.com/eeo/promotion).

\* IMPORTANT NOTICE ABOUT OPEN ACCESS \*

To assist authors whose funding agencies mandate public access to published research findings sooner than 12 months after publication The Journal of Physiology allows authors to pay an open access (OA) fee to have their papers made freely available immediately on publication.

You will receive an email from Wiley with details on how to register or log-in to Wiley Authors Services where you will be able to place an OnlineOpen order.

You can check if your funder or institution has a Wiley Open Access Account here <https://authorservices.wiley.com/author-resources/Journal-Authors/licensing-and-open-access/open-access/author-compliance-tool.html>

Your article will be made Open Access upon publication, or as soon as payment is received.

If you wish to put your paper on an OA website such as PMC or UKPMC or your institutional repository within 12 months of publication you must pay the open access fee, which covers the cost of publication.

OnlineOpen articles are deposited in PubMed Central (PMC) and PMC mirror sites. Authors of OnlineOpen articles are permitted to post the final, published PDF of their article on a website, institutional repository, or other free public server, immediately on publication.

Note to NIH-funded authors: The Journal of Physiology is published on PMC 12 months after publication, NIH-funded authors DO NOT NEED to pay to publish and DO NOT NEED to post their accepted papers on PMC.

-----  
EDITOR COMMENTS

Reviewing Editor:

Reviewers both deem the revision satisfactory. I concur. Congratulations on very nice work!

Senior Editor:

Excellent work, congratulations! Please make sure that all data are included in the main manuscript without supplemental material. There are still references to supplemental figures in the text.

Please update your article file (in Word) to include the following:

- (1) Remove any mention of supplemental figure 1 - please include all data in the main manuscript.
- (2) Please include a FULL title page as part of your article (Word) file (containing title, authors, affiliations, corresponding author name and contact details, keywords, and running title).

You can email your new article file to us at: [jp@physoc.org](mailto:jp@physoc.org)

-----  
REFEREE COMMENTS

Referee #1:

Authors have addressed all of my concerns, very nice study!

Referee #2:

The revisions clarify and improve this excellent study. All comments have been addressed.

**1st Confidential Review**

**08-Jul-2022**

---
